# Supplementary material for: Microdeletion on chromosome 8p23.1 in a familial form of severe Buruli ulcer
Source: PubMed Central journal article supplement (PMC5945055; doi:10.1371/journal.pntd.0006429), 2018-04-30

**S1 Table. List of genes in the eight linkage regions retrieved from the Vega database as implemented in the Ensembl browser (vega.archive.ensembl.org).**

| Chrom.linkloc | Gene start (bp) | Gene end  | Gene ensembl ID | Gene biotype                     | Gene name     | Gene description                                                              |
|---------------|-----------------|-----------|-----------------|----------------------------------|---------------|-------------------------------------------------------------------------------|
| 2.1           | 19458220        | 19468961  | ENSG00000234597 | lincRNA                          | AC010096.1    |                                                                               |
| 2.1           | 19475450        | 19488850  | ENSG00000237992 | lincRNA                          | LINC01808     | long intergenic non-protein coding RNA 1808 [HGNC:52611]                      |
| 2.1           | 19711715        | 19717576  | ENSG00000235911 | lincRNA                          | AC019055.1    |                                                                               |
| 2.2           | 24491914        | 24770702  | ENSG00000084676 | protein_coding                   | NCOA1         | nuclear receptor coactivator 1 [HGNC:7668]                                    |
| 2.2           | 24564630        | 24564738  | ENSG00000202430 | rRNA                             | RNA5SP88      | RNA, 5S ribosomal pseudogene 88 [HGNC:42886]                                  |
| 2.2           | 24676309        | 24676415  | ENSG00000206732 | snRNA                            | RNU6-936P     | RNA, U6 small nuclear 936, pseudogene [HGNC:47899]                            |
| 2.2           | 24789734        | 24793382  | ENSG00000184924 | protein_coding                   | PTRHD1        | peptidyl-IRNA hydrolase domain containing 1 [HGNC:33782]                      |
| 2.2           | 24793136        | 24822376  | ENSG00000138092 | protein_coding                   | CENPO         | centromere protein O [HGNC:28152]                                             |
| 2.2           | 24819169        | 24919839  | ENSG00000138031 | protein_coding                   | ADCY3         | adenylate cyclase 3 [HGNC:234]                                                |
| 2.2           | 24825610        | 24826717  | ENSG00000271936 | antisense                        | RP11-443B20.1 |                                                                               |
| 2.2           | 24943636        | 24972094  | ENSG00000115137 | protein_coding                   | DNAJC27       | DnaJ heat shock protein family (Hsp40) member C27 [HGNC:30290]                |
| 2.2           | 24968958        | 24969224  | ENSG00000237953 | processed_pseudogene             | AC013267.1    |                                                                               |
| 2.2           | 24969388        | 24969477  | ENSG00000202479 | snoRNA                           | SNORD14       | Small nucleolar RNA SNORD14 [Source:RFAM;Acc:RF00016]                         |
| 2.2           | 24971390        | 25039694  | ENSG00000224165 | antisense                        | DNAJC27-AS1   | DNAJC27 antisense RNA 1 [HGNC:42943]                                          |
| 2.2           | 25008845        | 25008946  | ENSG00000207069 | misc_RNA                         | Y_RNA         | Y RNA [Source:RFAM;Acc:RF00019]                                               |
| 2.2           | 25042130        | 25159137  | ENSG00000084710 | protein_coding                   | EFR3B         | EFR3 homolog B [HGNC:29155]                                                   |
| 2.2           | 25058032        | 25058329  | ENSG00000276653 | misc_RNA                         | RN7SL856P     | RNA, 7SL, cytoplasmic 856, pseudogene [HGNC:46872]                            |
| 2.2           | 25079901        | 25081689  | ENSG00000229593 | processed_pseudogene             | SUCLA2P3      | succinate-CoA ligase ADP-forming beta subunit pseudogene 3 [HGNC:38103]       |
| 2.2           | 25160853        | 25168903  | ENSG00000115138 | protein_coding                   | POMC          | proopiomelanocortin [HGNC:9201]                                               |
| 2.2           | 25204313        | 25209202  | ENSG00000230452 | antisense                        | LINC01381     | long intergenic non-protein coding RNA 1381 [HGNC:50653]                      |
| 2.2           | 25227855        | 25342590  | ENSG00000119772 | protein_coding                   | DNMT3A        | DNA methyltransferase 3 alpha [HGNC:2978]                                     |
| 2.2           | 25328640        | 25328721  | ENSG00000221445 | miRNA                            | MIR1301       | microRNA 1301 [HGNC:35253]                                                    |
| 5             | 103408941       | 103412511 | ENSG00000250567 | lincRNA                          | CTD-2154H6.1  |                                                                               |
| 5             | 103430406       | 103526618 | ENSG00000226926 | transcribed_unitary_pseudogene   | PDZPH1P       | PDZ and pleckstrin homology domains 1, pseudogene [HGNC:51488]                |
| 5             | 103528434       | 103541985 | ENSG00000248757 | lincRNA                          | LINC02115     | long intergenic non-protein coding RNA 2115 [HGNC:52970]                      |
| 5             | 103548855       | 103562793 | ENSG00000112874 | protein_coding                   | NUDT12        | nudix hydrolase 12 [HGNC:18826]                                               |
| 7.1           | 78017057        | 79453574  | ENSG00000187391 | protein_coding                   | MAGI2         | membrane associated guanylate kinase, WW/PDZ domain containing 2 [HGNC:18957] |
| 7.1           | 78134079        | 78134851  | ENSG00000281008 | TEC                              | RP4-587D13.1  |                                                                               |
| 7.1           | 78170195        | 78170915  | ENSG00000280958 | TEC                              | RP4-587D13.2  |                                                                               |
| 7.1           | 78347142        | 78359458  | ENSG00000231322 | transcribed_processed_pseudogene | RPL13AP17     | ribosomal protein L13a pseudogene 17 [HGNC:36167]                             |
| 7.2           | 80096600        | 80097215  | ENSG00000230853 | processed_pseudogene             | RPL10P11      | ribosomal protein L10 pseudogene 11 [HGNC:36565]                              |
| 7.2           | 80133955        | 80219402  | ENSG00000127955 | protein_coding                   | GNAI1         | G protein subunit alpha i1 [HGNC:4384]                                        |
| 7.2           | 80245926        | 80246225  | ENSG00000244392 | misc_RNA                         | RN7SL869P     | RNA, 7SL, cytoplasmic 869, pseudogene [HGNC:46885]                            |
| 7.2           | 80246409        | 80312456  | ENSG00000234223 | lincRNA                          | AC003988.1    |                                                                               |
| 8.1           | 7143632         | 7143841   | ENSG00000254683 | processed_pseudogene             | SNRPCP6       | small nuclear ribonucleoprotein polypeptide C pseudogene 6 [HGNC:49821]       |
| 8.1           | 7170550         | 7170741   | ENSG00000230106 | processed_pseudogene             | SNRPCP15      | small nuclear ribonucleoprotein polypeptide C pseudogene 15 [HGNC:49830]      |
| 8.1           | 7190901         | 7191563   | ENSG00000214268 | processed_pseudogene             | RPS3AP33      | ribosomal protein S3a pseudogene 33 [HGNC:35476]                              |
| 8.1           | 7200756         | 7200857   | ENSG00000231930 | processed_pseudogene             | AF228730.5    |                                                                               |
| 8.1           | 7238286         | 7238631   | ENSG00000255025 | processed_pseudogene             | AF228730.13   |                                                                               |
| 8.1           | 7246726         | 7247571   | ENSG00000177306 | unprocessed_pseudogene           | OR7E125P      | olfactory receptor family 7 subfamily E member 125 pseudogene [HGNC:15098]    |
| 8.1           | 7256904         | 7259914   | ENSG00000230045 | unprocessed_pseudogene           | FAM90A15P     | family with sequence similarity 90 member A15, pseudogene [HGNC:32263]        |
| 8.1           | 7264526         | 7267536   | ENSG00000233132 | unprocessed_pseudogene           | FAM90A3P      | family with sequence similarity 90 member A3, pseudogene [HGNC:32251]         |
| 8.1           | 7272148         | 7275158   | ENSG00000249005 | unprocessed_pseudogene           | FAM90A4P      | family with sequence similarity 90 member A4, pseudogene [HGNC:32252]         |
| 8.1           | 7279770         | 7282780   | ENSG00000223885 | unprocessed_pseudogene           | FAM90A13P     | family with sequence similarity 90 member A13, pseudogene [HGNC:32261]        |
| 8.1           | 7287392         | 7290402   | ENSG00000215373 | unprocessed_pseudogene           | FAM90A5P      | family with sequence similarity 90 member A5, pseudogene [HGNC:32253]         |
| 8.1           | 7295014         | 7298024   | ENSG00000233295 | unprocessed_pseudogene           | FAM90A20P     | family with sequence similarity 90 member A20, pseudogene [HGNC:32268]        |
| 8.1           | 7301611         | 7355354   | ENSG00000215374 | lincRNA                          | FAM66B        | family with sequence similarity 66 member B [HGNC:28890]                      |
| 8.1           | 7312846         | 7319951   | ENSG00000206034 | unprocessed_pseudogene           | DEFB109P1B    | defensin beta 109 pseudogene 1B [HGNC:33469]                                  |
| 8.1           | 7332387         | 7333979   | ENSG00000230549 | protein_coding                   | USP17L1       | ubiquitin specific peptidase 17-like family member 1 [HGNC:37182]             |

| Chrom. | linkloc | Gene start (bp) | Gene end | Gene ensembl ID | Gene biotype                     | Gene name      | Gene description                                                           |
|--------|---------|-----------------|----------|-----------------|----------------------------------|----------------|----------------------------------------------------------------------------|
| 8.1    |         | 7337115         | 7338707  | ENSG00000236125 | protein_coding                   | USP17L4        | ubiquitin specific peptidase 17-like family member 4 [HGNC:37176]          |
| 8.1    |         | 7341826         | 7342942  | ENSG00000235778 | unprocessed_pseudogene           | AC130360.8     |                                                                            |
| 8.1    |         | 7355517         | 7385558  | ENSG00000215372 | protein_coding                   | ZNF705G        | zinc finger protein 705G [HGNC:37134]                                      |
| 8.1    |         | 7373114         | 7377500  | ENSG00000215371 | unprocessed_pseudogene           | DEFB108P2      | defensin beta 108 pseudogene 2 [HGNC:30847]                                |
| 8.1    |         | 7414860         | 7416863  | ENSG00000177257 | protein_coding                   | DEFB4B         | defensin beta 4B [HGNC:30193]                                              |
| 8.1    |         | 7418991         | 7420546  | ENSG00000255128 | processed_pseudogene             | HSPD1P3        | heat shock protein family D (Hsp60) member 1 pseudogene 3 [HGNC:5264]      |
| 8.1    |         | 7428888         | 7430348  | ENSG00000177243 | protein_coding                   | DEFB103B       | defensin beta 103B [HGNC:31702]                                            |
| 8.1    |         | 7442684         | 7463674  | ENSG00000164871 | protein_coding                   | SPAG11B        | sperm associated antigen 11B [HGNC:14534]                                  |
| 8.1    |         | 7470308         | 7475082  | ENSG00000177023 | protein_coding                   | DEFB104B       | defensin beta 104B [HGNC:26165]                                            |
| 8.1    |         | 7482504         | 7486400  | ENSG00000187082 | protein_coding                   | DEFB106B       | defensin beta 106B [HGNC:28879]                                            |
| 8.1    |         | 7487669         | 7489593  | ENSG00000186599 | protein_coding                   | DEFB105B       | defensin beta 105B [HGNC:29930]                                            |
| 8.1    |         | 7495846         | 7509311  | ENSG00000198129 | protein_coding                   | DEFB107B       | defensin beta 107B [HGNC:31918]                                            |
| 8.1    |         | 7539628         | 7542450  | ENSG00000255251 | protein_coding                   | PRR23D1        | proline rich 23 domain containing 1 [HGNC:49420]                           |
| 8.1    |         | 7549053         | 7552062  | ENSG00000248944 | unprocessed_pseudogene           | FAM90A6P       | family with sequence similarity 90 member A6, pseudogene [HGNC:32254]      |
| 8.1    |         | 7556700         | 7559712  | ENSG00000236660 | unprocessed_pseudogene           | FAM90A7P       | family with sequence similarity 90 member A7, pseudogene [HGNC:32255]      |
| 8.1    |         | 7564350         | 7567360  | ENSG00000234749 | unprocessed_pseudogene           | FAM90A21P      | family with sequence similarity 90 member A21, pseudogene [HGNC:32269]     |
| 8.1    |         | 7571995         | 7575006  | ENSG00000215365 | unprocessed_pseudogene           | FAM90A22P      | family with sequence similarity 90 member A22, pseudogene [HGNC:32270]     |
| 8.1    |         | 7579644         | 7582653  | ENSG00000241737 | unprocessed_pseudogene           | FAM90A23P      | family with sequence similarity 90 member A23, pseudogene [HGNC:32271]     |
| 8.1    |         | 7592006         | 7592916  | ENSG00000233176 | unprocessed_pseudogene           | OR7E157P       | olfactory receptor family 7 subfamily E member 157 pseudogene [HGNC:31231] |
| 8.1    |         | 7601004         | 7601267  | ENSG00000254796 | processed_pseudogene             | RP11-1118M6.2  |                                                                            |
| 8.1    |         | 7696830         | 7697093  | ENSG00000254889 | processed_pseudogene             | AC084121.14    |                                                                            |
| 8.1    |         | 7705182         | 7706113  | ENSG00000254715 | unprocessed_pseudogene           | OR7E154P       | olfactory receptor family 7 subfamily E member 154 pseudogene [HGNC:31309] |
| 8.1    |         | 7715443         | 7718453  | ENSG00000189393 | unprocessed_pseudogene           | FAM90A14P      | family with sequence similarity 90 member A14, pseudogene [HGNC:32262]     |
| 8.1    |         | 7723091         | 7726101  | ENSG00000231656 | unprocessed_pseudogene           | FAM90A18P      | family with sequence similarity 90 member A18, pseudogene [HGNC:32266]     |
| 8.1    |         | 7730739         | 7733749  | ENSG00000229477 | unprocessed_pseudogene           | FAM90A16P      | family with sequence similarity 90 member A16, pseudogene [HGNC:32264]     |
| 8.1    |         | 7738387         | 7741396  | ENSG00000224710 | unprocessed_pseudogene           | FAM90A8P       | family with sequence similarity 90 member A8, pseudogene [HGNC:32256]      |
| 8.1    |         | 7746034         | 7749606  | ENSG00000223535 | unprocessed_pseudogene           | FAM90A17P      | family with sequence similarity 90 member A17, pseudogene [HGNC:32265]     |
| 8.1    |         | 7753682         | 7756692  | ENSG00000237122 | unprocessed_pseudogene           | FAM90A19P      | family with sequence similarity 90 member A19, pseudogene [HGNC:32267]     |
| 8.1    |         | 7761330         | 7764340  | ENSG00000235825 | unprocessed_pseudogene           | FAM90A9P       | family with sequence similarity 90 member A9, pseudogene [HGNC:32257]      |
| 8.1    |         | 7768977         | 7771988  | ENSG00000254597 | unprocessed_pseudogene           | FAM90A10P      | family with sequence similarity 90 member A10, pseudogene [HGNC:32258]     |
| 8.1    |         | 7778591         | 7781413  | ENSG00000255378 | protein_coding                   | PRR23D2        | proline rich 23 domain containing 2 [HGNC:49396]                           |
| 8.1    |         | 7793716         | 7795870  | ENSG00000254776 | unprocessed_pseudogene           | AC084121.17    |                                                                            |
| 8.1    |         | 7811720         | 7815716  | ENSG00000186572 | protein_coding                   | DEFB107A       | defensin beta 107A [HGNC:18086]                                            |
| 8.1    |         | 7821966         | 7823889  | ENSG00000186562 | protein_coding                   | DEFB105A       | defensin beta 105A [HGNC:18087]                                            |
| 8.1    |         | 7825172         | 7829053  | ENSG00000186579 | protein_coding                   | DEFB106A       | defensin beta 106A [HGNC:18088]                                            |
| 8.1    |         | 7836471         | 7841242  | ENSG00000176782 | protein_coding                   | DEFB104A       | defensin beta 104A [HGNC:18115]                                            |
| 8.1    |         | 7847876         | 7868867  | ENSG00000178287 | protein_coding                   | SPAG11A        | sperm associated antigen 11A [HGNC:33342]                                  |
| 8.1    |         | 7881204         | 7882664  | ENSG00000176797 | protein_coding                   | DEFB103A       | defensin beta 103A [HGNC:15967]                                            |
| 8.1    |         | 7891003         | 7892555  | ENSG00000254543 | processed_pseudogene             | HSPD1P2        | heat shock protein family D (Hsp60) member 1 pseudogene 2 [HGNC:5263]      |
| 8.1    |         | 7894629         | 7896711  | ENSG00000171711 | protein_coding                   | DEFB4A         | defensin beta 4A [HGNC:2767]                                               |
| 8.1    |         | 7926337         | 7952413  | ENSG00000215356 | protein_coding                   | ZNF705B        | zinc finger protein 705B [HGNC:32284]                                      |
| 8.1    |         | 7934412         | 7938770  | ENSG00000229907 | unprocessed_pseudogene           | DEFB108P1      | defensin beta 108 pseudogene 1 [HGNC:18089]                                |
| 8.1    |         | 7955014         | 8008755  | ENSG00000225725 | lincRNA                          | FAM66E         | family with sequence similarity 66 member E [HGNC:18735]                   |
| 8.1    |         | 7967344         | 7968544  | ENSG00000255211 | unprocessed_pseudogene           | RP11-1195F20.7 |                                                                            |
| 8.1    |         | 7971661         | 7973253  | ENSG00000237038 | protein_coding                   | USP17L8        | ubiquitin specific peptidase 17-like family member 8 [HGNC:37181]          |
| 8.1    |         | 7976393         | 7977985  | ENSG00000225327 | protein_coding                   | USP17L3        | ubiquitin specific peptidase 17-like family member 3 [HGNC:37175]          |
| 8.1    |         | 7990415         | 7997521  | ENSG00000205989 | unprocessed_pseudogene           | DEFB109        |                                                                            |
| 8.1    |         | 8011782         | 8017011  | ENSG00000233115 | unprocessed_pseudogene           | FAM90A11P      | family with sequence similarity 90 member A11, pseudogene [HGNC:32259]     |
| 8.1    |         | 8019429         | 8024652  | ENSG00000215354 | ranscribed_unprocessed_pseudogen | FAM90A24P      | family with sequence similarity 90 member A24, pseudogene [HGNC:32272]     |
| 8.1    |         | 8027077         | 8032305  | ENSG00000254229 | unprocessed_pseudogene           | FAM90A12P      | family with sequence similarity 90 member A12, pseudogene [HGNC:32260]     |
| 8.1    |         | 8039978         | 8040953  | ENSG00000227013 | unprocessed_pseudogene           | OR7E96P        | olfactory receptor family 7 subfamily E member 96 pseudogene [HGNC:14815]  |
| 8.1    |         | 8048919         | 8049267  | ENSG00000253881 | processed_pseudogene             | RP11-52B19.8   |                                                                            |

| Chrom. | linkloc | Gene start (bp) | Gene end | Gene ensembl ID | Gene biotype                      | Gene name           | Gene description                                                              |
|--------|---------|-----------------|----------|-----------------|-----------------------------------|---------------------|-------------------------------------------------------------------------------|
| 8.1    |         | 8086022         | 8086765  | ENSG00000255459 | processed_pseudogene              | RP11-52B19.10       |                                                                               |
| 8.1    |         | 8088941         | 8089089  | ENSG00000221305 | miRNA                             | MIR548I3            | microRNA 548i-3 [HGNC:35354]                                                  |
| 8.1    |         | 8095946         | 8096726  | ENSG00000244427 | processed_pseudogene              | RP11-52B19.1        |                                                                               |
| 8.1    |         | 8116745         | 8116949  | ENSG00000254311 | processed_pseudogene              | SNRPCP17            | small nuclear ribonucleoprotein polypeptide C pseudogene 17 [HGNC:49832]      |
| 8.1    |         | 8154308         | 8216916  | ENSG00000249188 | unprocessed_pseudogene            | ENPP7P1             | ectonucleotide pyrophosphatase/phosphodiesterase 7 pseudogene 1 [HGNC:48699]  |
| 8.1    |         | 8167819         | 8226614  | ENSG00000253893 | antisense                         | FAM85B              | family with sequence similarity 85 member B [HGNC:32160]                      |
| 8.1    |         | 8188535         | 8189195  | ENSG00000268955 | lincRNA                           | RP11-556O5.6        |                                                                               |
| 8.1    |         | 8228595         | 8244865  | ENSG00000173295 | transcribed_unprocessed_pseudogen | FAM86B3P            | family with sequence similarity 86 member B3, pseudogene [HGNC:44371]         |
| 8.1    |         | 8236003         | 8244667  | ENSG00000253981 | transcribed_unprocessed_pseudogen | ALG1L13P            | asparagine-linked glycosylation 1-like 13, pseudogene [HGNC:44382]            |
| 8.1    |         | 8317736         | 8386498  | ENSG00000275342 | protein_coding                    | PRAG1               | PEAK1 related kinase activating pseudokinase 1 [HGNC:25438]                   |
| 8.1    |         | 8414690         | 8424632  | ENSG00000253505 | lincRNA                           | CTA-398F10.1        |                                                                               |
| 8.1    |         | 8456909         | 8461337  | ENSG00000254153 | lincRNA                           | CTA-398F10.2        |                                                                               |
| 8.2    |         | 11982321        | 11984590 | ENSG00000205883 | protein_coding                    | DEFB135             | defensin beta 135 [HGNC:32400]                                                |
| 8.2    |         | 11993174        | 11996312 | ENSG00000205882 | protein_coding                    | DEFB134             | defensin beta 134 [HGNC:32399]                                                |
| 8.2    |         | 11999087        | 11999468 | ENSG00000225174 | processed_pseudogene              | RP11-481A20.4       |                                                                               |
| 8.2    |         | 12003400        | 12004082 | ENSG00000254507 | transcribed_processed_pseudogene  | RP11-481A20.10      |                                                                               |
| 8.2    |         | 12025244        | 12025598 | ENSG00000255016 | processed_pseudogene              | RP11-481A20.8       |                                                                               |
| 8.2    |         | 12033646        | 12034612 | ENSG00000254817 | unprocessed_pseudogene            | OR7E160P            | olfactory receptor family 7 subfamily E member 160 pseudogene [HGNC:31233]    |
| 8.2    |         | 12043506        | 12043670 | ENSG00000254700 | processed_pseudogene              | RP11-1236K1.11      |                                                                               |
| 8.2    |         | 12064389        | 12071747 | ENSG00000233050 | protein_coding                    | RP11-1236K1.1       |                                                                               |
| 8.2    |         | 12087396        | 12087445 | ENSG00000252029 | rRNA                              | RNA5SP253           | RNA, 5S ribosomal pseudogene 253 [HGNC:43153]                                 |
| 8.2    |         | 12095176        | 12099536 | ENSG00000255544 | unprocessed_pseudogene            | DEFB108P3           | defensin beta 108 pseudogene 3 [HGNC:26227]                                   |
| 8.2    |         | 12104389        | 12115516 | ENSG00000215343 | protein_coding                    | ZNF705D             | zinc finger protein 705D [HGNC:33202]                                         |
| 8.2    |         | 12115782        | 12177550 | ENSG00000255052 | antisense                         | FAM66D              | family with sequence similarity 66 member D [HGNC:24159]                      |
| 8.2    |         | 12128107        | 12129298 | ENSG00000254923 | processed_pseudogene              | RP11-1236K1.8       |                                                                               |
| 8.2    |         | 12132417        | 12134438 | ENSG00000226430 | protein_coding                    | USP17L7             | ubiquitin specific peptidase 17-like family member 7 [HGNC:37180]             |
| 8.2    |         | 12137168        | 12139077 | ENSG00000223443 | protein_coding                    | USP17L2             | ubiquitin specific peptidase 17-like family member 2 [HGNC:34434]             |
| 8.2    |         | 12150895        | 12151134 | ENSG00000254866 | processed_pseudogene              | DEFB109P3           | defensin beta 109 pseudogene 3 [HGNC:30838]                                   |
| 8.2    |         | 12172761        | 12175771 | ENSG00000205879 | unprocessed_pseudogene            | FAM90A2P            | family with sequence similarity 90 member A2, pseudogene [HGNC:32250]         |
| 8.2    |         | 12178697        | 12182719 | ENSG00000249889 | unprocessed_pseudogene            | ALG1L11P            | asparagine-linked glycosylation 1-like 11, pseudogene [HGNC:44380]            |
| 8.2    |         | 12182096        | 12194133 | ENSG00000186523 | protein_coding                    | FAM86B1             | family with sequence similarity 86 member B1 [HGNC:28268]                     |
| 8.2    |         | 12194467        | 12196280 | ENSG00000255495 | antisense                         | AC145124.2          |                                                                               |
| 8.2    |         | 12205759        | 12206389 | ENSG00000254527 | processed_pseudogene              | ENPP7P12            | ectonucleotide pyrophosphatase/phosphodiesterase 7 pseudogene 12 [HGNC:48697] |
| 8.2    |         | 12290071        | 12296180 | ENSG00000237215 | unprocessed_pseudogene            | ABC12-47043100G14.2 |                                                                               |
| 8.2    |         | 12310962        | 12318316 | ENSG00000232948 | protein_coding                    | DEFB130             | defensin beta 130 [HGNC:18107]                                                |
| 8.2    |         | 12333644        | 12333693 | ENSG00000252535 | rRNA                              | RNA5SP254           | RNA, 5S ribosomal pseudogene 254 [HGNC:43154]                                 |
| 8.2    |         | 12341426        | 12345776 | ENSG00000254623 | unprocessed_pseudogene            | DEFB108P4           | defensin beta 108 pseudogene 4 [HGNC:30174]                                   |
| 8.2    |         | 12356136        | 12359391 | ENSG00000215339 | unprocessed_pseudogene            | ZNF705CP            | zinc finger protein 705C, pseudogene [HGNC:32283]                             |
| 8.2    |         | 12362019        | 12388296 | ENSG00000227888 | lincRNA                           | FAM66A              | family with sequence similarity 66 member A [HGNC:30444]                      |
| 8.2    |         | 12374366        | 12375546 | ENSG00000254423 | processed_pseudogene              | RP11-351I21.7       |                                                                               |
| 8.2    |         | 12378679        | 12380265 | ENSG00000255556 | processed_pseudogene              | RP11-351I21.6       |                                                                               |
| 8.2    |         | 12393209        | 12400366 | ENSG00000242296 | unprocessed_pseudogene            | DEFB109P1           | defensin beta 109 pseudogene 1 [HGNC:18090]                                   |
| 8.2    |         | 12412827        | 12414373 | ENSG00000270074 | lincRNA                           | RP11-351I21.11      |                                                                               |
| 8.2    |         | 12415080        | 12418090 | ENSG00000251402 | unprocessed_pseudogene            | FAM90A25P           | family with sequence similarity 90 member A25, pseudogene [HGNC:32246]        |
| 8.2    |         | 12421032        | 12425000 | ENSG00000250794 | unprocessed_pseudogene            | ALG1L12P            | asparagine-linked glycosylation 1-like 12, pseudogene [HGNC:44381]            |
| 8.2    |         | 12425614        | 12436343 | ENSG00000145002 | protein_coding                    | FAM86B2             | family with sequence similarity 86 member B2 [HGNC:32222]                     |
| 8.2    |         | 12448013        | 12511278 | ENSG00000255549 | unprocessed_pseudogene            | ENPP7P6             | ectonucleotide pyrophosphatase/phosphodiesterase 7 pseudogene 6 [HGNC:48698]  |
| 8.2    |         | 12476462        | 12477122 | ENSG00000270154 | lincRNA                           | RP11-419I17.2       |                                                                               |
| 8.2    |         | 12537079        | 12665588 | ENSG00000283674 | lincRNA                           | RP11-419I17.1       |                                                                               |
| 8.2    |         | 12570350        | 12571130 | ENSG00000242607 | processed_pseudogene              | RPS3AP34            | ribosomal protein S3a pseudogene 34 [HGNC:36293]                              |
| 8.2    |         | 12580287        | 12581063 | ENSG00000255122 | processed_pseudogene              | RP11-303G3.6        |                                                                               |
| 8.2    |         | 12628476        | 12629256 | ENSG00000244289 | processed_pseudogene              | RPS3AP35            | ribosomal protein S3a pseudogene 35 [HGNC:35902]                              |

| Chrom.linkloc | Gene start (bp) | Gene end | Gene ensembl ID | Gene biotype           | Gene name     | Gene description                                                         |
|---------------|-----------------|----------|-----------------|------------------------|---------------|--------------------------------------------------------------------------|
| 8.2           | 12638428        | 12638602 | ENSG00000255253 | processed_pseudogene   | RP11-303G3.9  |                                                                          |
| 8.2           | 12676035        | 12676389 | ENSG00000254581 | processed_pseudogene   | RP11-303G3.10 |                                                                          |
| 8.2           | 12684154        | 12685153 | ENSG00000177400 | unprocessed_pseudogene | OR7E8P        | olfactory receptor family 7 subfamily E member 8 pseudogene [HGNC:8458]  |
| 8.2           | 12696307        | 12697273 | ENSG00000254917 | unprocessed_pseudogene | OR7E15P       | olfactory receptor family 7 subfamily E member 15 pseudogene [HGNC:8386] |
| 8.2           | 12703066        | 12704056 | ENSG00000254724 | unprocessed_pseudogene | OR7E10P       | olfactory receptor family 7 subfamily E member 10 pseudogene [HGNC:8381] |
| 8.2           | 12719132        | 12719190 | ENSG00000264512 | miRNA                  | MIR5692A2     | microRNA 5692a-2 [HGNC:43466]                                            |
| 8.2           | 12721894        | 12756073 | ENSG00000154359 | protein_coding         | LONRF1        | LON peptidase N-terminal domain and ring finger 1 [HGNC:26302]           |
| 8.2           | 12727232        | 12727304 | ENSG00000266206 | miRNA                  | MIR3926-1     | microRNA 3926-1 [HGNC:38959]                                             |
| 8.2           | 12727237        | 12727299 | ENSG00000283523 | miRNA                  | MIR3926-2     | microRNA 3926-2 [HGNC:38883]                                             |
| 8.2           | 12765849        | 12811478 | ENSG00000254813 | lincRNA                | RP11-252C15.1 |                                                                          |
| 8.2           | 12794243        | 12818291 | ENSG00000255494 | lincRNA                | LINC00681     | long intergenic non-protein coding RNA 681 [HGNC:44423]                  |
| 8.2           | 12945642        | 13031503 | ENSG00000250305 | protein_coding         | KIAA1456      | KIAA1456 [HGNC:26725]                                                    |
| 8.2           | 12958387        | 12962200 | ENSG00000251468 | unprocessed_pseudogene | RP11-369K16.1 |                                                                          |
| 8.3           | 87867601        | 87868607 | ENSG00000273978 | unprocessed_pseudogene | CTB-118P15.3  |                                                                          |
| 8.3           | 87870743        | 87874068 | ENSG00000176566 | protein_coding         | DCAF4L2       | DDB1 and CUL4 associated factor 4 like 2 [HGNC:26657]                    |
| 8.3           | 87974165        | 88019113 | ENSG00000253171 | antisense              | CTB-118P15.2  |                                                                          |
| 8.3           | 88032009        | 88328025 | ENSG00000156103 | protein_coding         | MMP16         | matrix metalloproteinase 16 [HGNC:7162]                                  |
| 8.3           | 88326836        | 88737134 | ENSG00000253553 | antisense              | RP11-586K2.1  |                                                                          |
| 8.3           | 88396437        | 88396547 | ENSG00000251904 | rRNA                   | RNA5SP272     | RNA, 5S ribosomal pseudogene 272 [HGNC:43172]                            |
| 8.3           | 88485110        | 88486094 | ENSG00000250962 | processed_pseudogene   | RP11-691I3.1  |                                                                          |
| 8.3           | 88808318        | 88808908 | ENSG00000271156 | lincRNA                | RP11-642C5.1  |                                                                          |

All gene biotypes are listed here. The exact intervals used to query Vega database were:

Chr2-1: 19417541-19746653 

Chr2-2: 24680948-25585907 

Chr5: 102620674-103702794 

Chr7-1: 77653409-77985583 

Chr7-2: 79635822-79894010 

Chr8-1: 6986241 - 8316581 

Chr8-2: 11840071-12880628 

Chr8-3: 88564546-89894046 

Supplement: pntd.0006429.s003.pdf [file pntd.0006429.s003.pdf]
