# Supplementary material for: Microdeletion on chromosome 8p23.1 in a familial form of severe Buruli ulcer
Source: PubMed Central journal article supplement (PMC5945055; doi:10.1371/journal.pntd.0006429), 2018-04-30

**S1 Figure. Detailed clinical course of the two severe BU patients P1 and P2.**

**Patient P1**

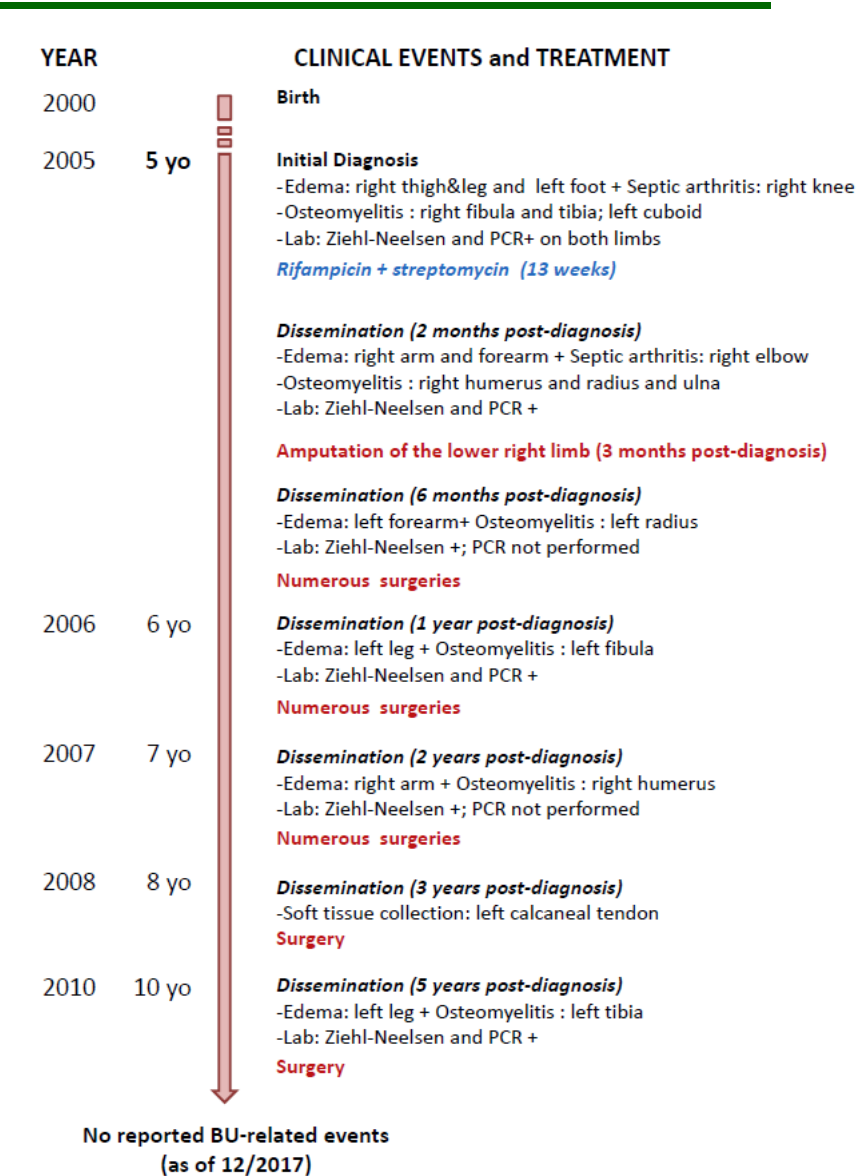

**Patient P2**

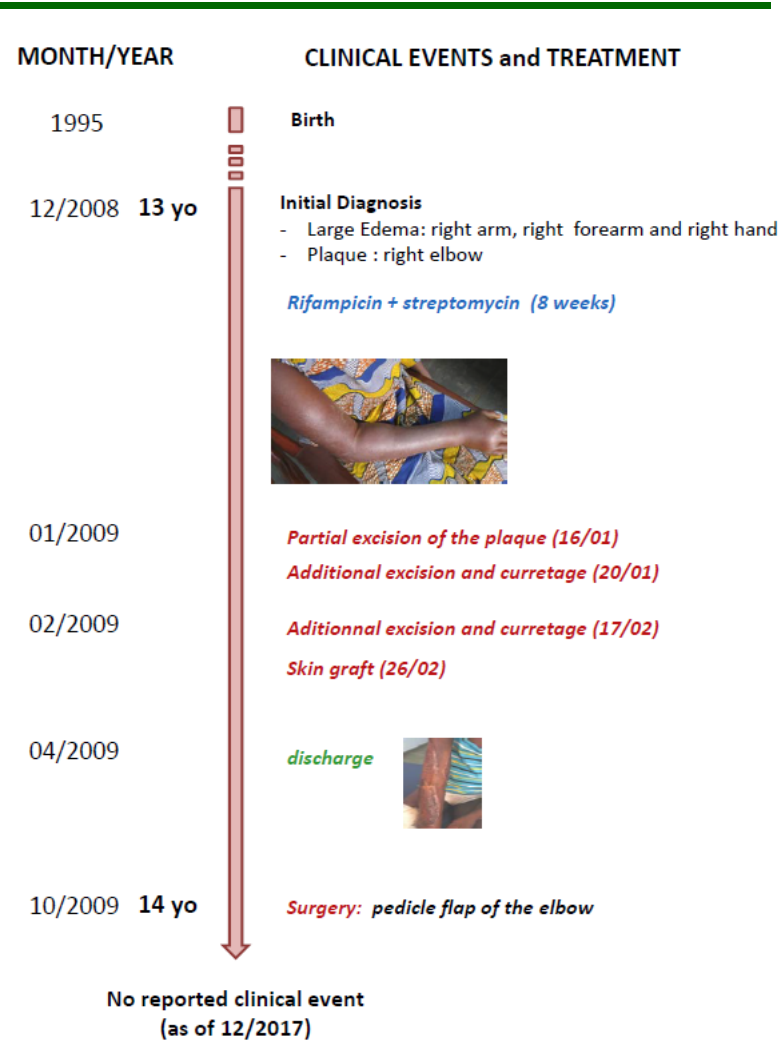

Supplement: pntd.0006429.s001.pdf [file pntd.0006429.s001.pdf]
