# Supplementary material for: Microdeletion on chromosome 8p23.1 in a familial form of severe Buruli ulcer
Source: PubMed Central journal article supplement (PMC5945055; doi:10.1371/journal.pntd.0006429), 2018-04-30

**S2 Figure. Schematic representation of beta-defensin clusters located in linkage regions 1 and 2 on chromosome 8.**

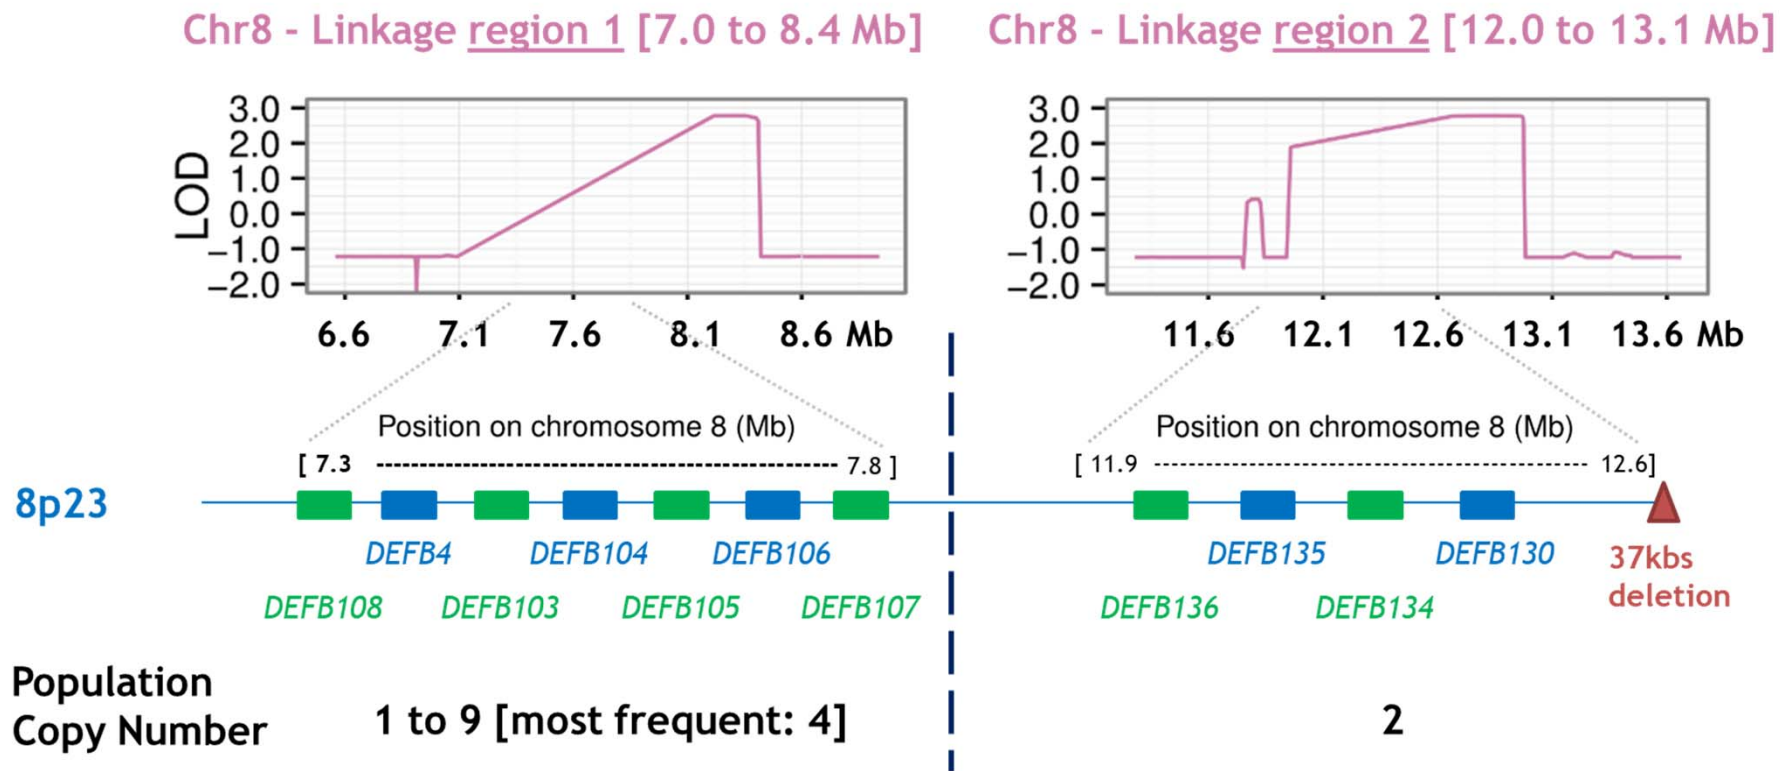

Supplement: pntd.0006429.s002.pdf [file pntd.0006429.s002.pdf]
